# Supplementary material
Source: PubMed Central journal article supplement (PMC7492346)
Supplement: 10068_2020_794_MOESM1_ESM.pdf [file 10068_2020_794_MOESM1_ESM.pdf]

## Supplementary Data

|                                                                                                          |    |
|----------------------------------------------------------------------------------------------------------|----|
| Figure S1. $^1\text{H}$ NMR (500 MHz, $\text{CD}_3\text{OD}$ ) spectrum of compound <b>2</b> . .....     | 2  |
| Figure S2. $^{13}\text{C}$ NMR (125 MHz, $\text{CD}_3\text{OD}$ ) spectrum of compound <b>2</b> . .....  | 3  |
| Figure S3. HSQC spectrum of compound <b>2</b> . .....                                                    | 4  |
| Figure S4. $^1\text{H}$ - $^1\text{H}$ COSY spectrum of compound <b>2</b> . .....                        | 4  |
| Figure S5. HMBC spectrum of compound <b>2</b> . .....                                                    | 5  |
| Figure S6. NOE spectra of compound <b>2</b> . .....                                                      | 6  |
| Figure S7. ESI-MS spectrum of compound <b>2</b> . .....                                                  | 7  |
| Figure S8. HRESI-MS of compound <b>2</b> . .....                                                         | 7  |
| Figure S9. $^1\text{H}$ NMR (500 MHz, $\text{CD}_3\text{OD}$ ) spectrum of compound <b>8</b> . .....     | 8  |
| Figure S10. $^{13}\text{C}$ NMR (125 MHz, $\text{CD}_3\text{OD}$ ) spectrum of compound <b>8</b> . ..... | 8  |
| Figure S11. HSQC spectrum of compound <b>8</b> . .....                                                   | 9  |
| Figure S12. HMBC spectrum of compound <b>8</b> . .....                                                   | 9  |
| Figure S13. ESI-MS spectrum of compound <b>8</b> . .....                                                 | 10 |
| Figure S14. HRESI-MS of compound <b>8</b> . .....                                                        | 10 |
| Figure S15. $^1\text{H}$ NMR (500 MHz, $\text{CD}_3\text{OD}$ ) spectrum of compound <b>9</b> . .....    | 11 |
| Figure S16. $^{13}\text{C}$ NMR (125 MHz, $\text{CD}_3\text{OD}$ ) spectrum of compound <b>9</b> . ..... | 11 |
| Figure S17. HSQC spectrum of compound <b>9</b> . .....                                                   | 12 |
| Figure S18. $^1\text{H}$ - $^1\text{H}$ COSY spectrum of compound <b>9</b> . .....                       | 12 |
| Figure S19. HMBC spectrum of compound <b>9</b> . .....                                                   | 13 |
| Figure S20. ESI-MS spectrum of compound <b>9</b> . .....                                                 | 13 |
| Figure S21. HRESI-MS of compound <b>9</b> . .....                                                        | 14 |

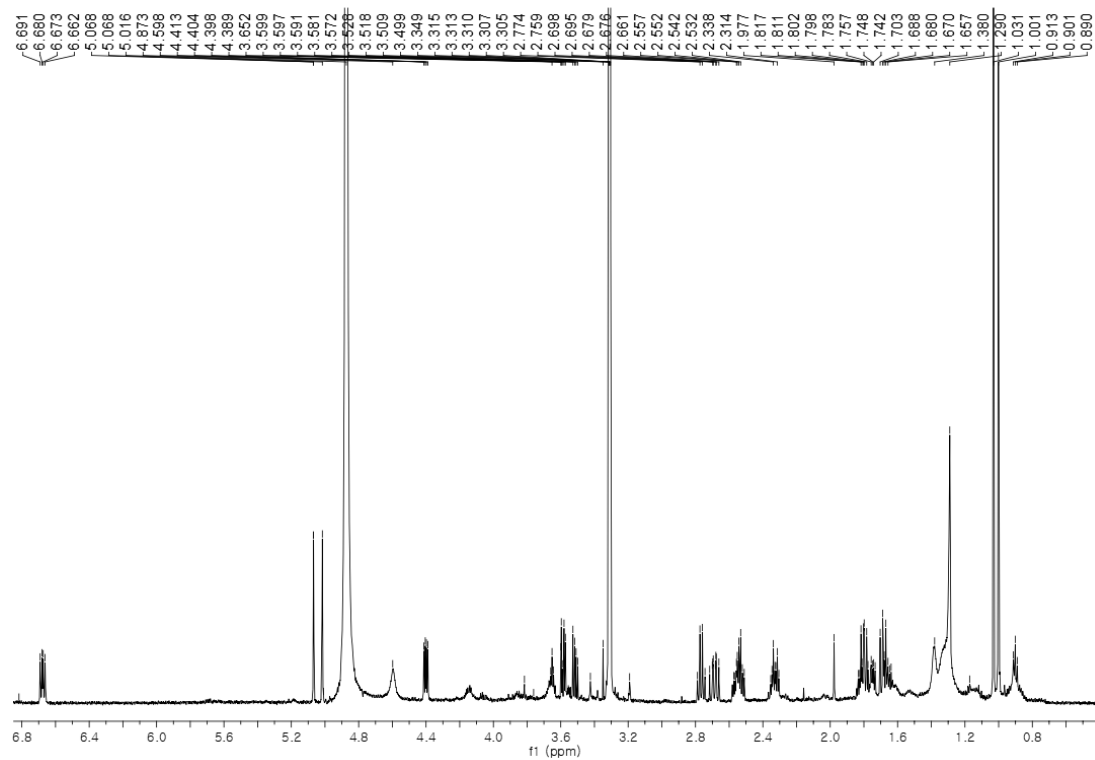

Figure S1.  $^1\text{H}$  NMR (600 MHz,  $\text{CD}_3\text{OD}$ ) spectrum of compound 2.

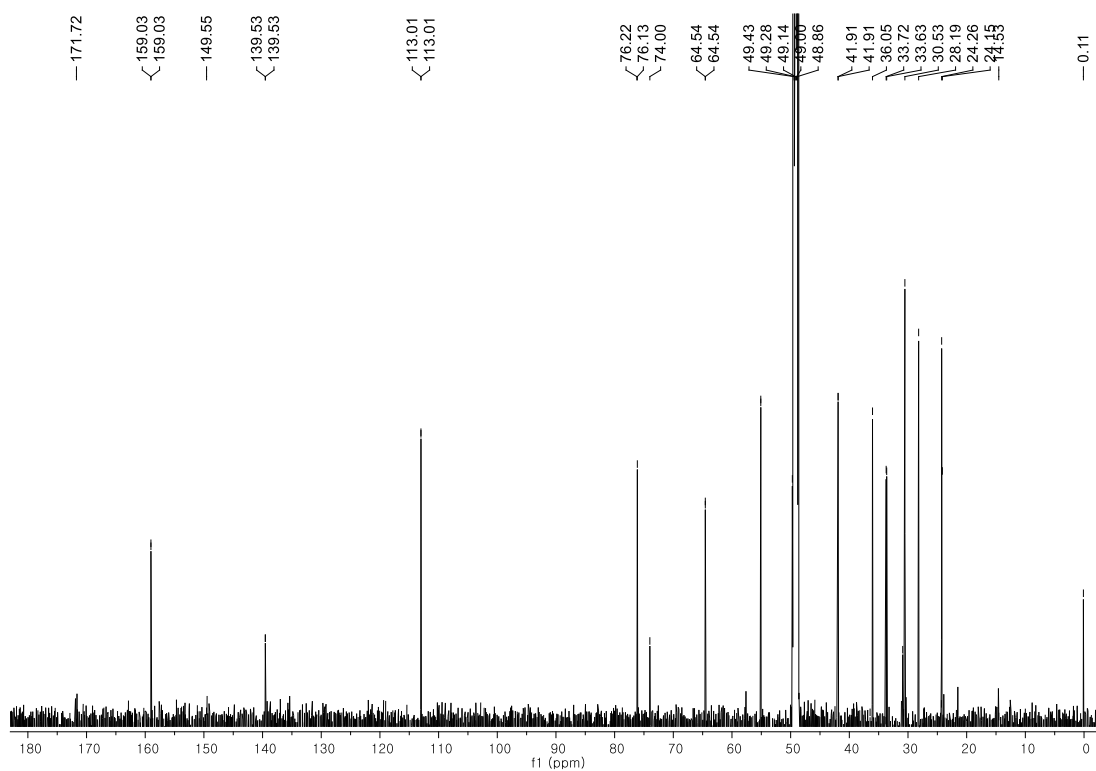

Figure S2.  $^{13}\text{C}$  NMR (150 MHz,  $\text{CD}_3\text{OD}$ ) spectrum of compound 2.

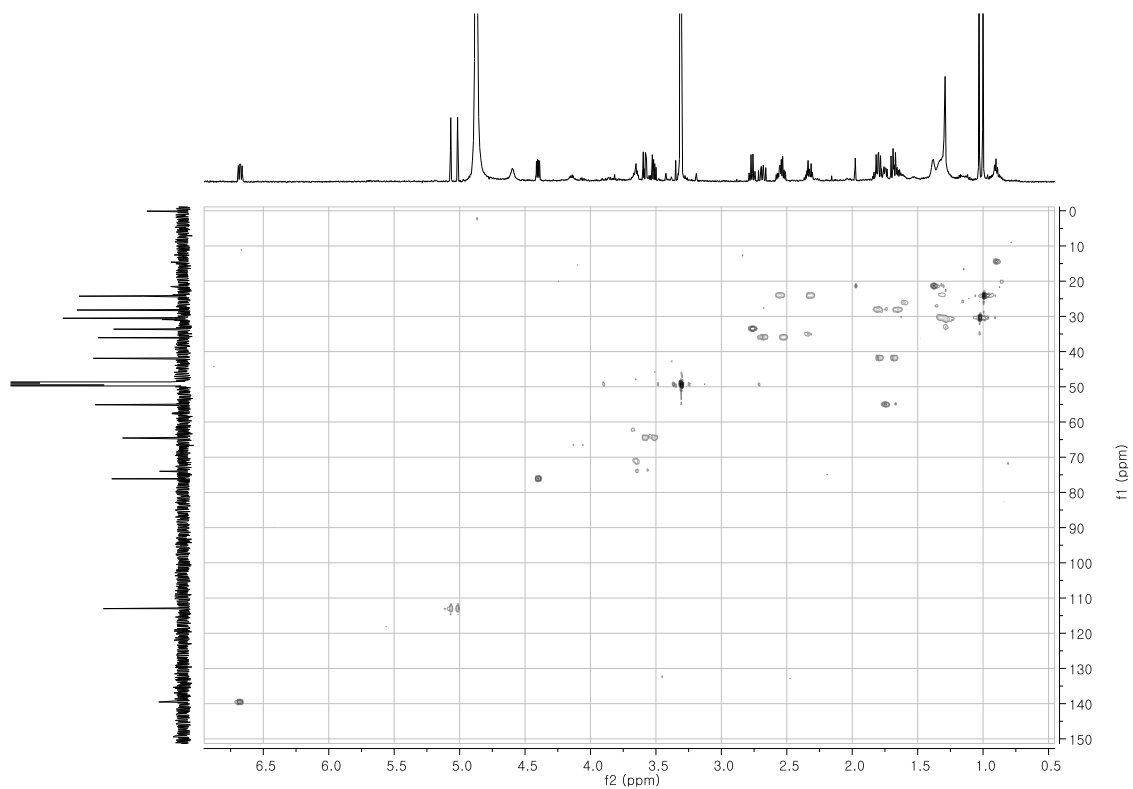

Figure S3. HSQC spectrum of compound **1**.

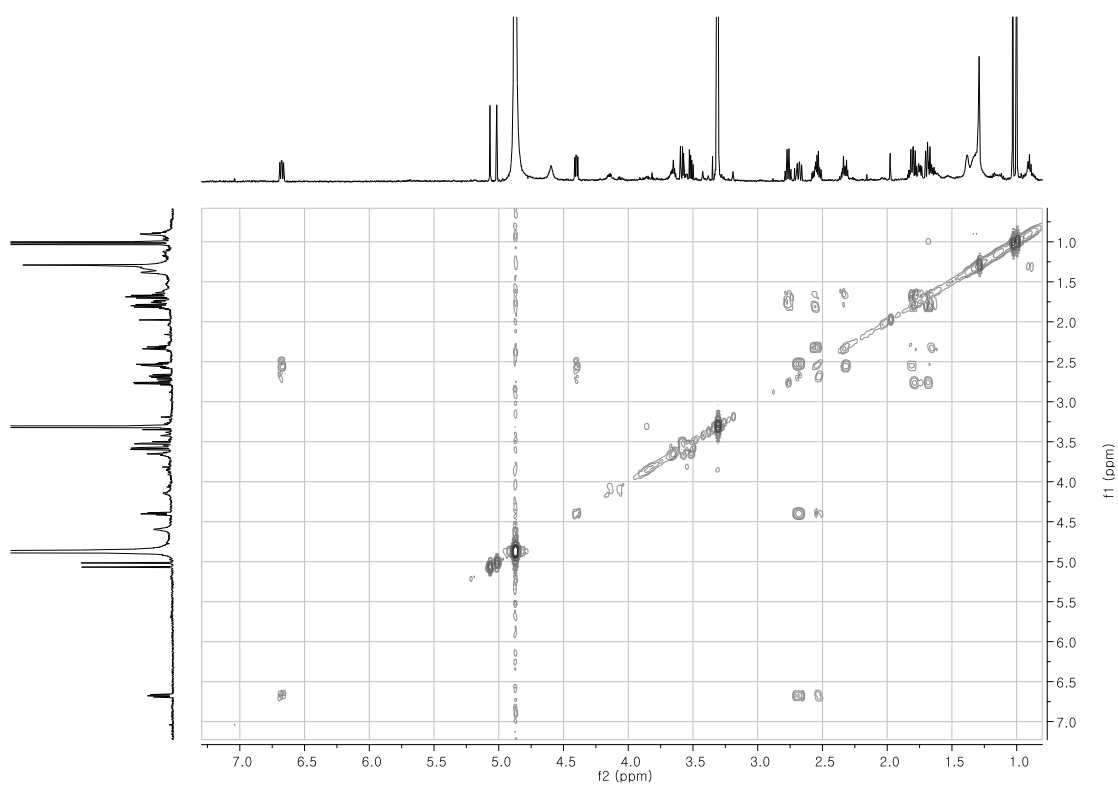

Figure S4.  $^1\text{H}$ - $^1\text{H}$  COSY spectrum of compound **1**.

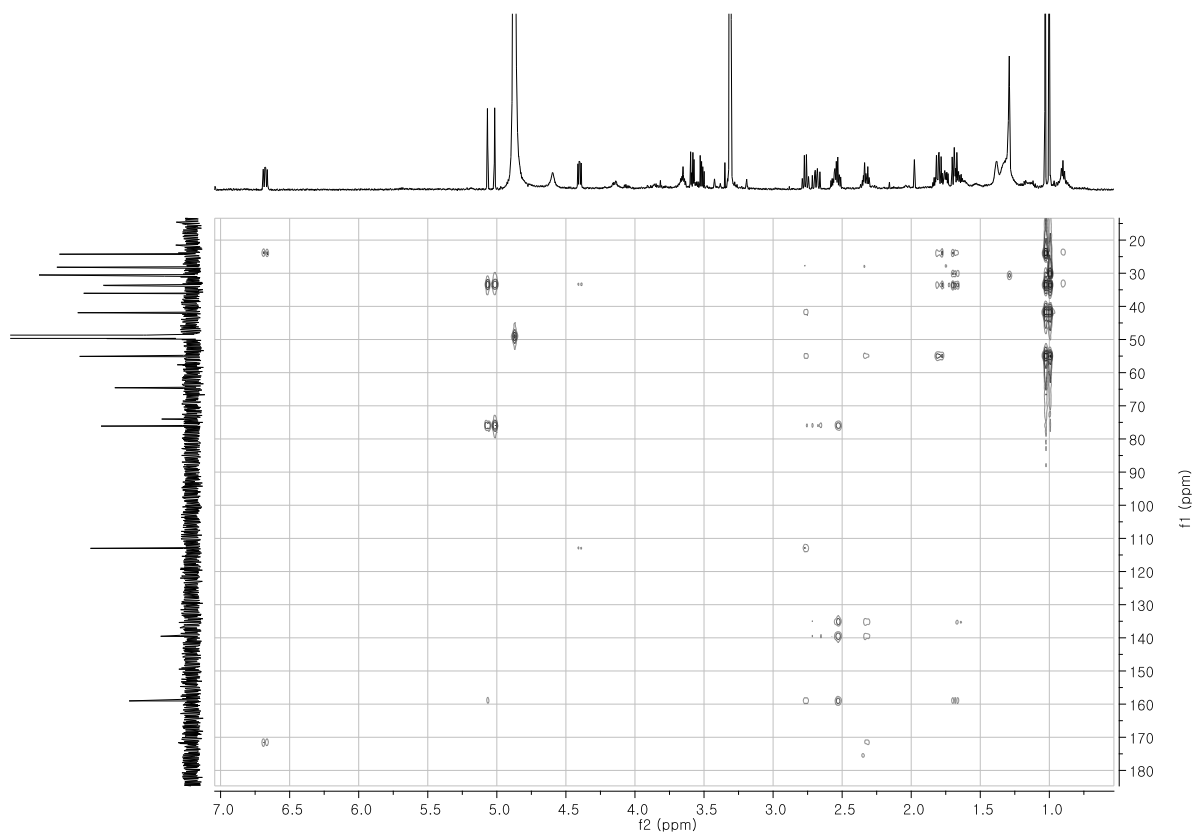

Figure S5. HMBC spectrum of compound **1**.

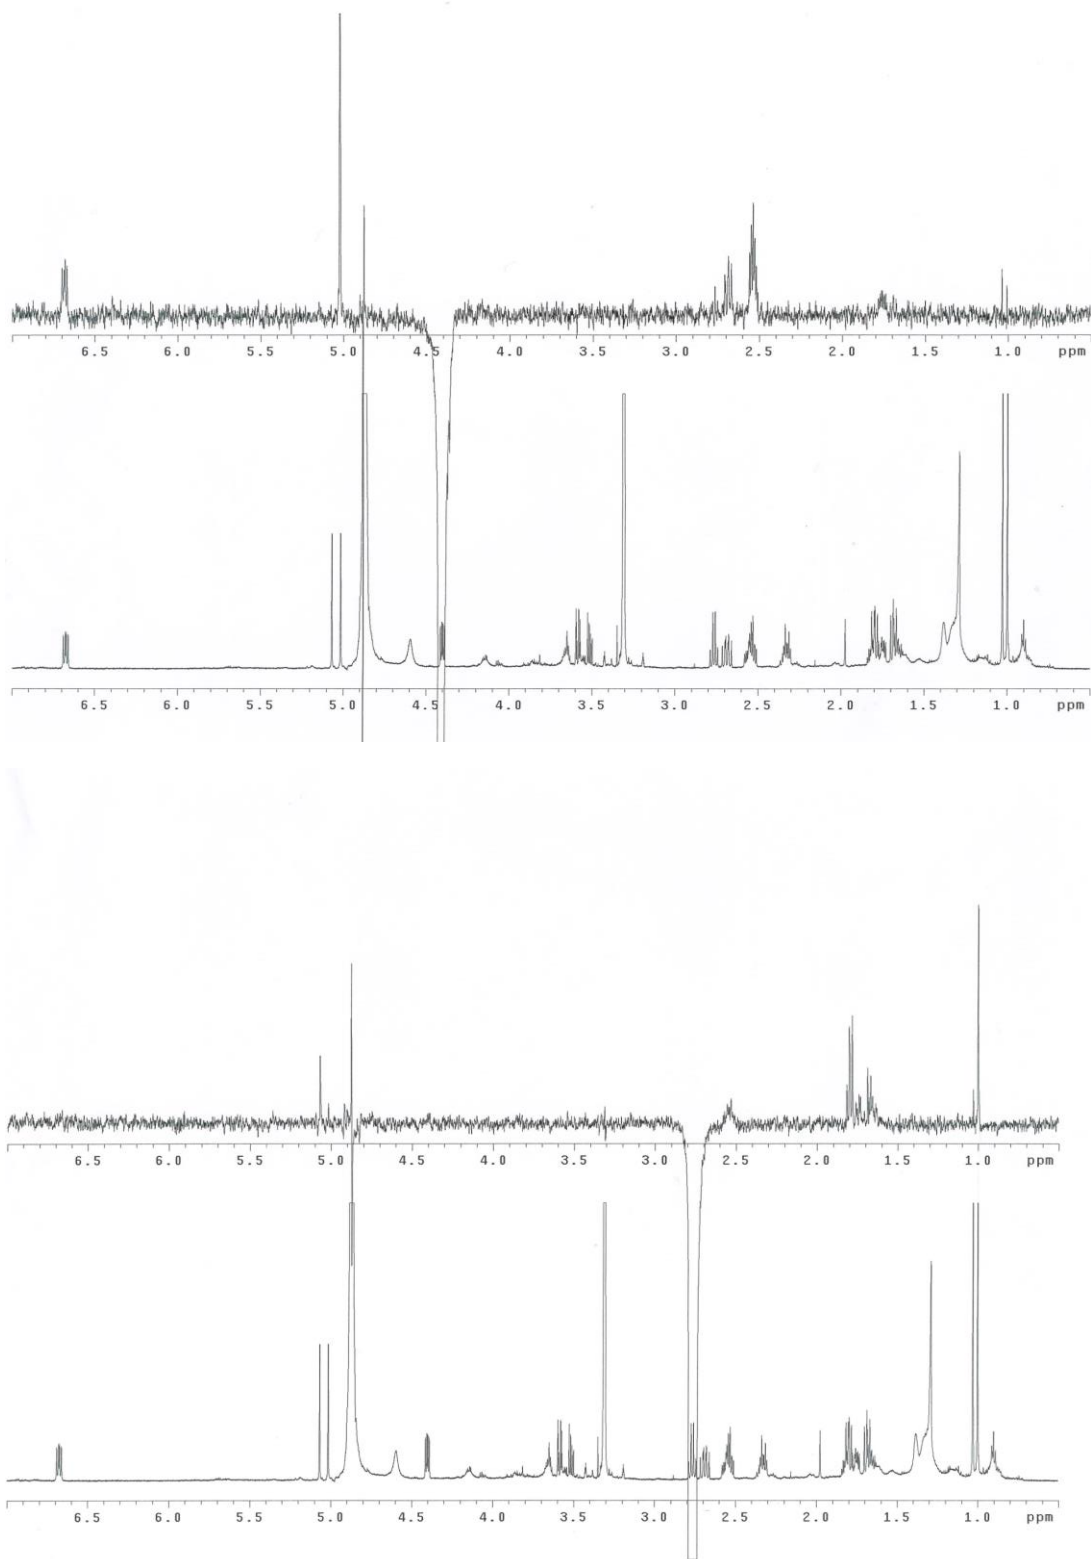

Figure S6. NOE spectra of compound 2.

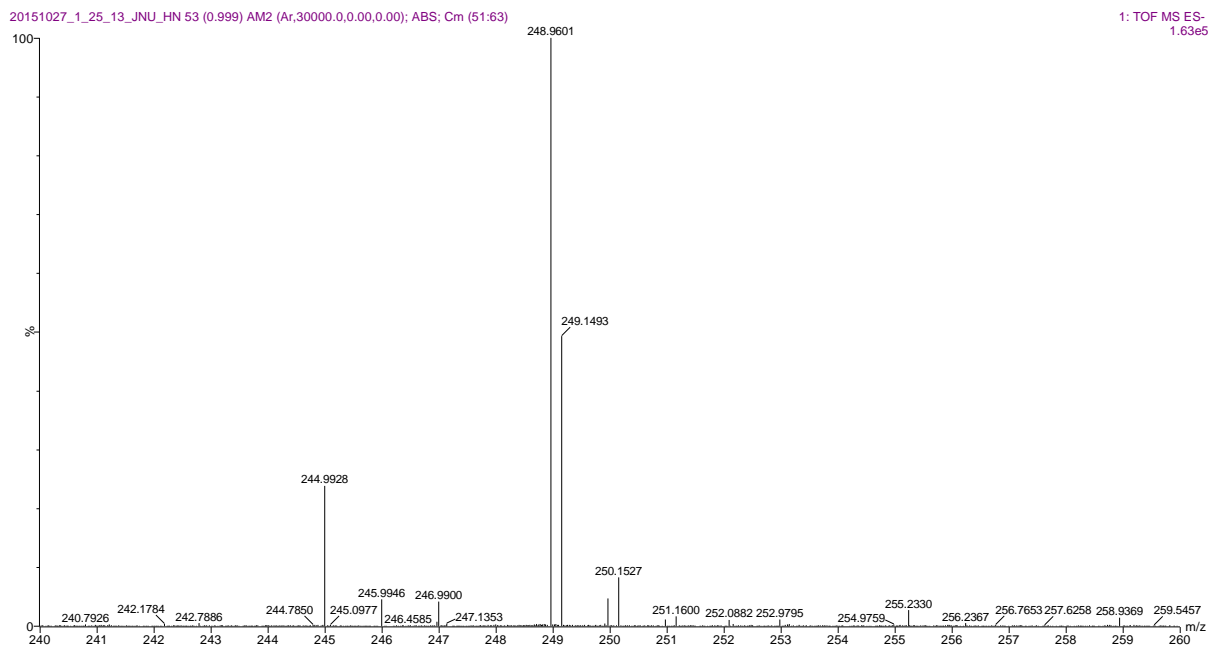

Figure S7. ESI-MS spectrum of compound **2**.

### Elemental Composition Report

#### Single Mass Analysis

Tolerance = 10.0 PPM / DBE: min = -1.5, max = 50.0

Element prediction: Off

Number of isotope peaks used for i-FIT = 3

Monoisotopic Mass, Even Electron Ions

100 formula(e) evaluated with 3 results within limits (all results (up to 1000) for each mass)

Elements Used:

C: 1-50 H: 1-50 O: 1-30

Minimum: -1.5

Maximum: 500.0 10.0 50.0

| Mass     | Calc. Mass | mDa | PPM | DBE | i-FIT | Norm | Conf(%) | Formula    |
|----------|------------|-----|-----|-----|-------|------|---------|------------|
| 249.1493 | 249.1491   | 0.2 | 0.8 | 5.5 | 716.6 | n/a  | n/a     | C15 H21 O3 |

Figure S8. HRESI-MS data of compound **2**.

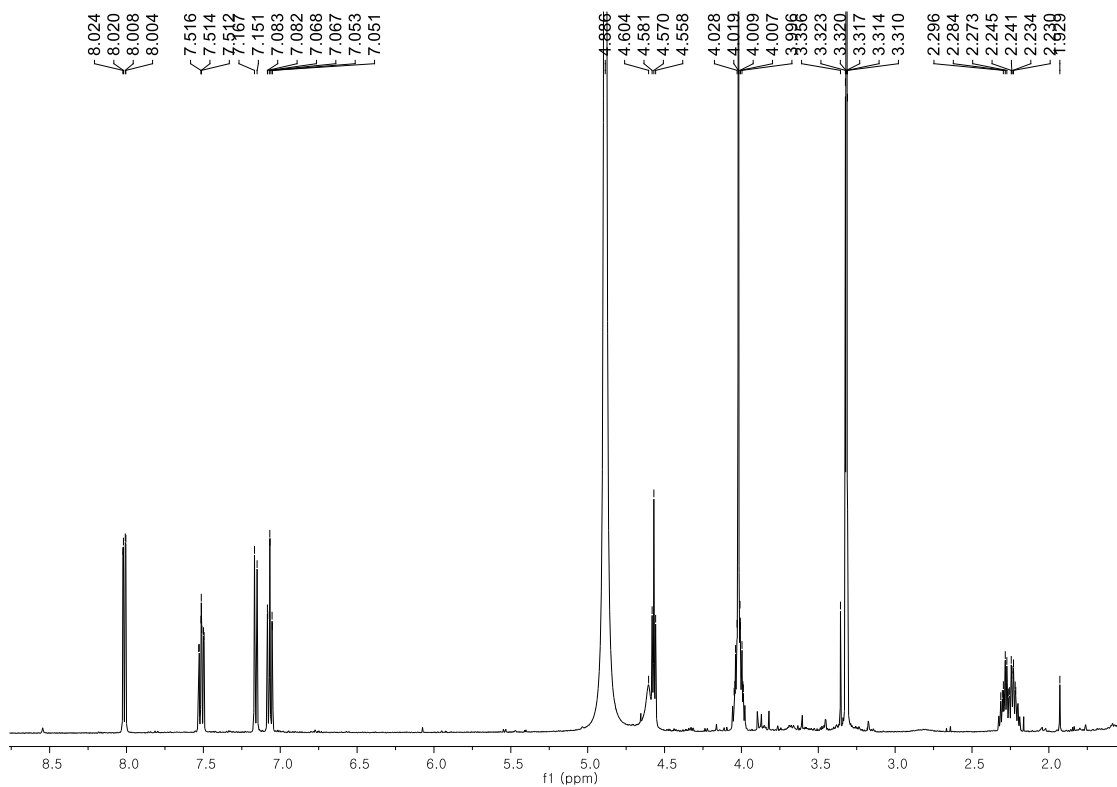

Figure S9.  $^1\text{H}$  NMR (500 MHz,  $\text{CD}_3\text{OD}$ ) spectrum of compound **8**.

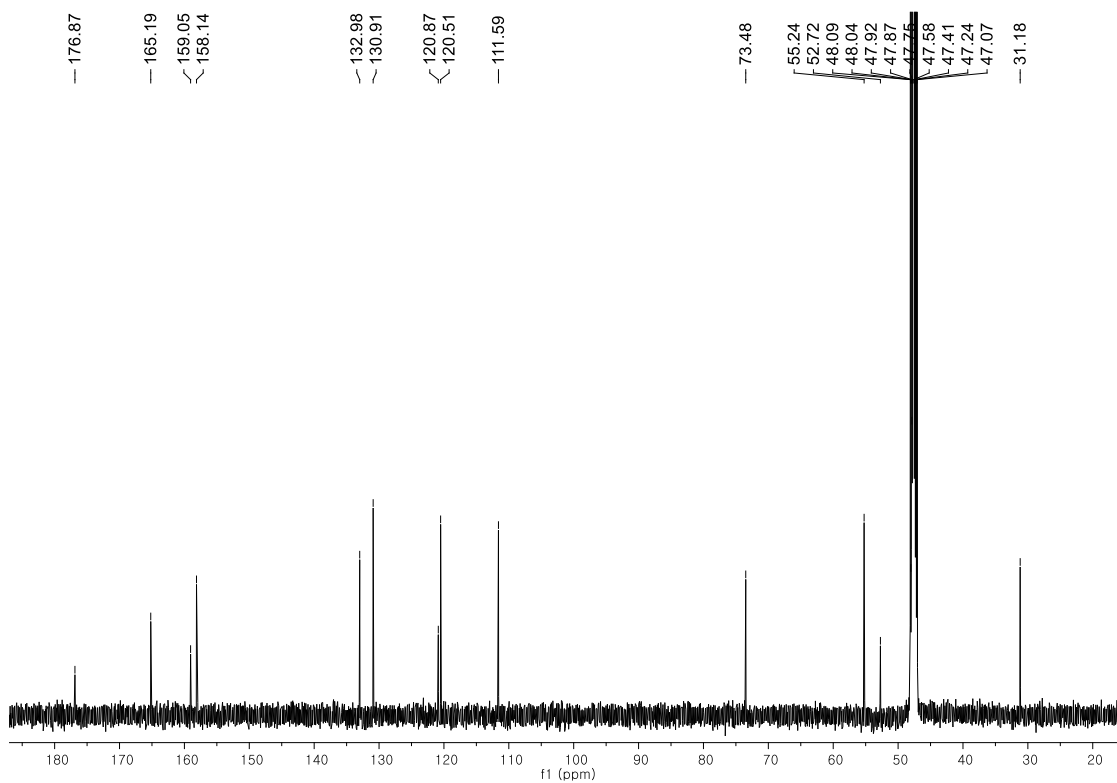

Figure S10.  $^{13}\text{C}$  NMR (125 MHz,  $\text{CD}_3\text{OD}$ ) spectrum of compound **8**.

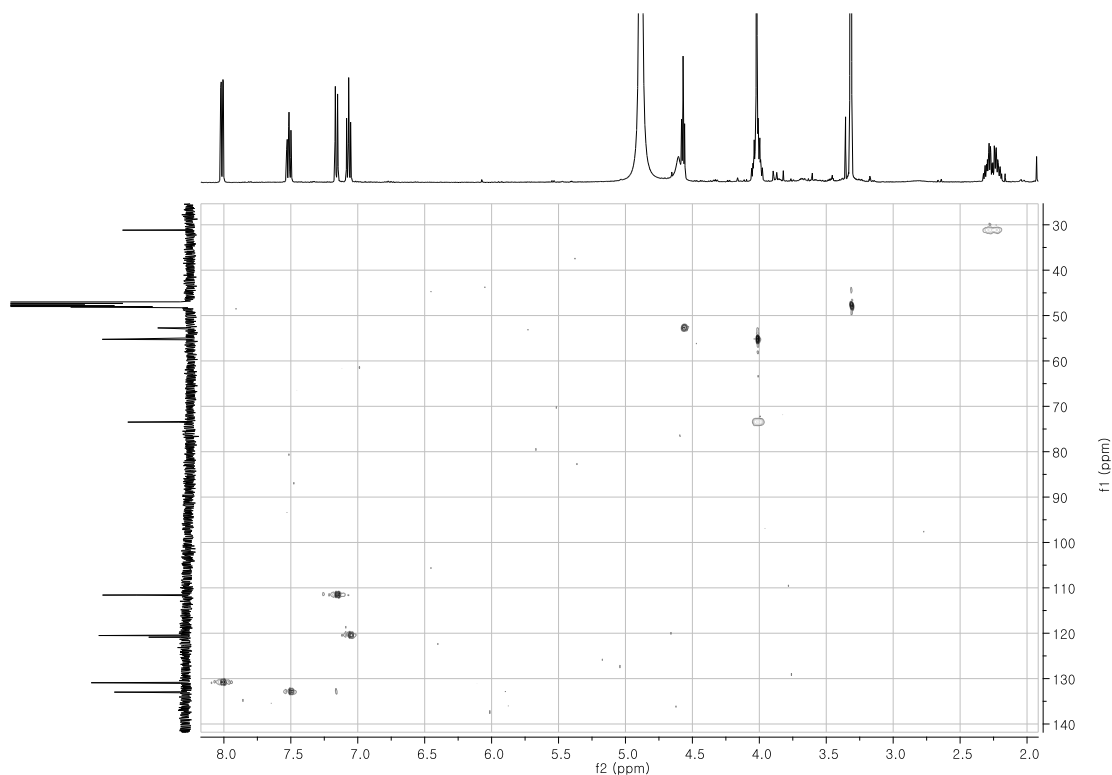

Figure S11. HSQC spectrum of compound **8**.

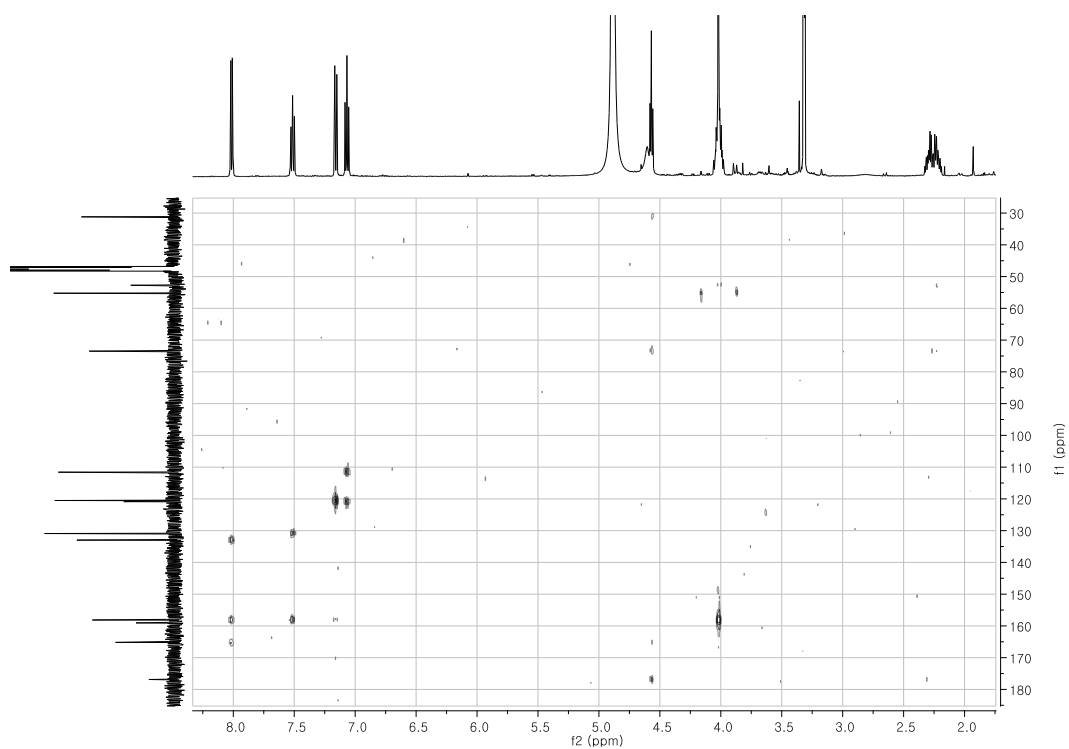

Figure S12. HMBC spectrum of compound **8**.



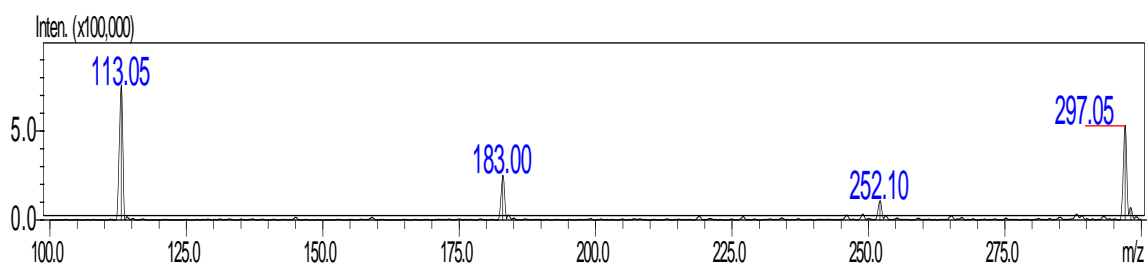

Figure S13. ESI-MS (negative) spectrum of compound **8**.

### Elemental Composition Report

#### Single Mass Analysis

Tolerance = 10.0 PPM / DBE: min = -1.5, max = 50.0

Element prediction: Off

Number of isotope peaks used for i-FIT = 3

Monoisotopic Mass, Even Electron Ions

115 formula(e) evaluated with 2 results within limits (all results (up to 1000) for each mass)

Elements Used:

C: 1-50 H: 1-50 O: 1-30

Minimum: -1.5

Maximum: 500.0 10.0 50.0

| Mass     | Calc. Mass | mDa | PPM | DBE | i-FIT | Norm | Conf(%) | Formula      |
|----------|------------|-----|-----|-----|-------|------|---------|--------------|
| 254.1041 | 254.1023   | 1.8 | 1.6 | 6.5 | 362.7 | n/a  | n/a     | C12 H16 N1O5 |

Figure S14. HRESI-MS of compound **8**.

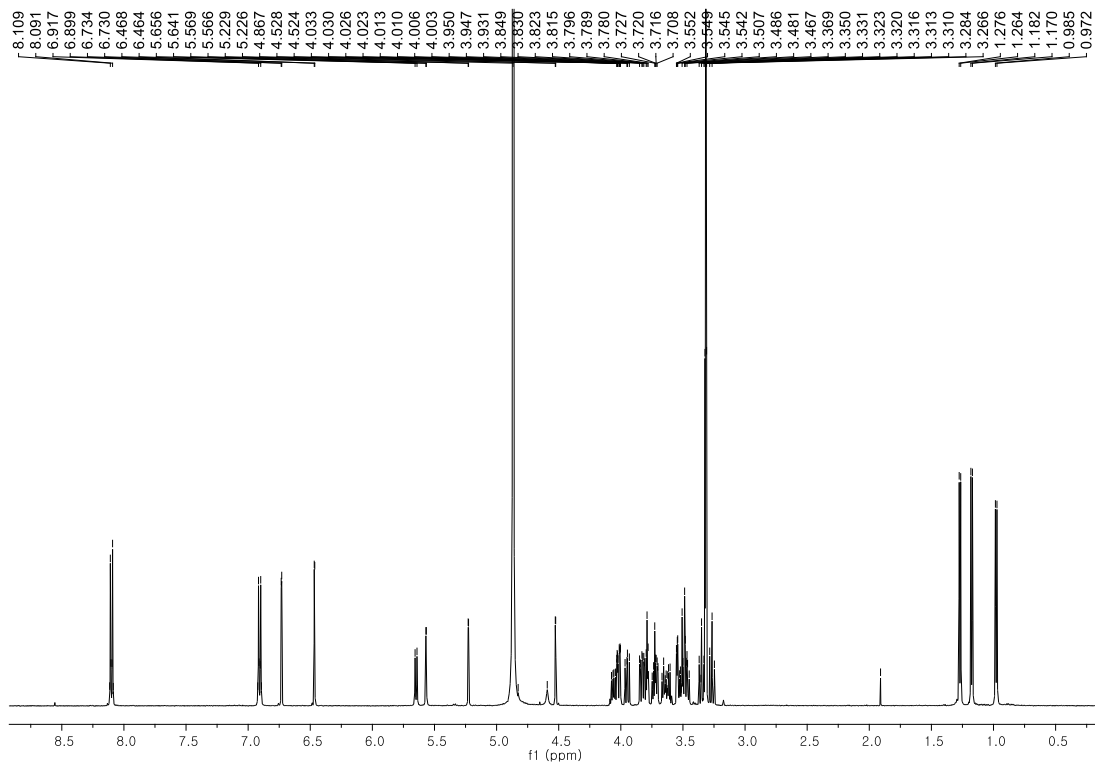

Figure S15.  $^1\text{H}$  NMR (500 MHz,  $\text{CD}_3\text{OD}$ ) spectrum of compound **9**.

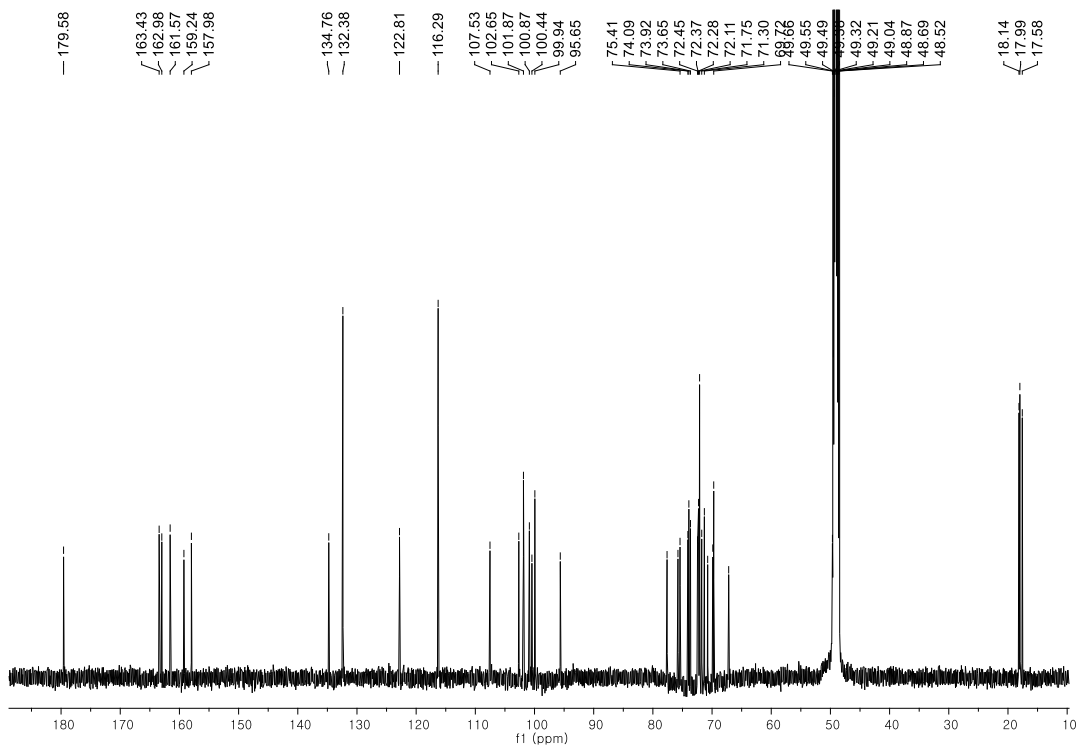

Figure S16.  $^{13}\text{C}$  NMR (125 MHz,  $\text{CD}_3\text{OD}$ ) spectrum of compound **9**.

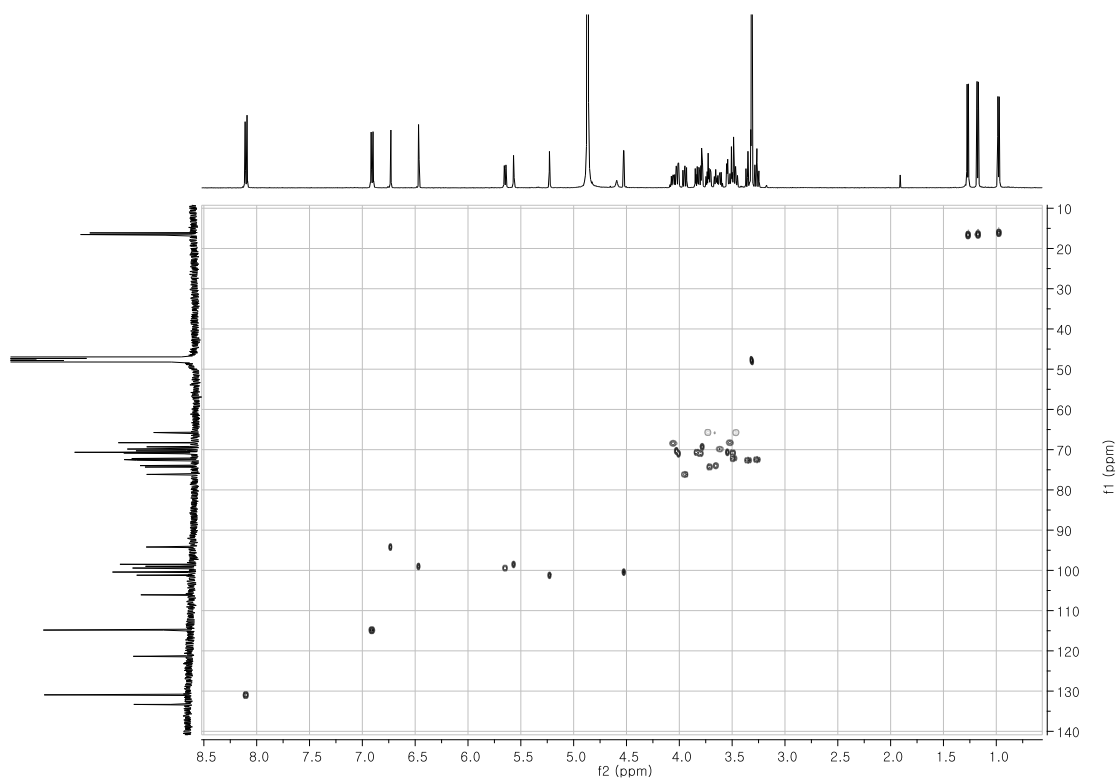

Figure S17. HSQC spectrum of compound **9**.

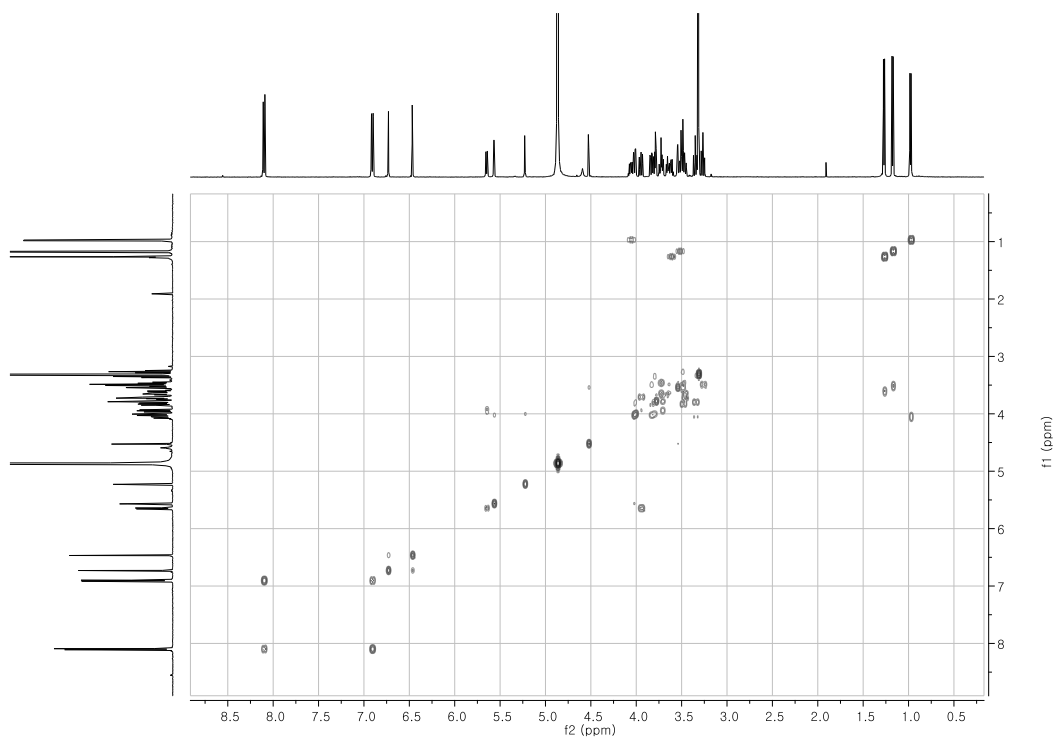

Figure S18.  $^1\text{H}$ - $^1\text{H}$  COSY spectrum of compound **9**.

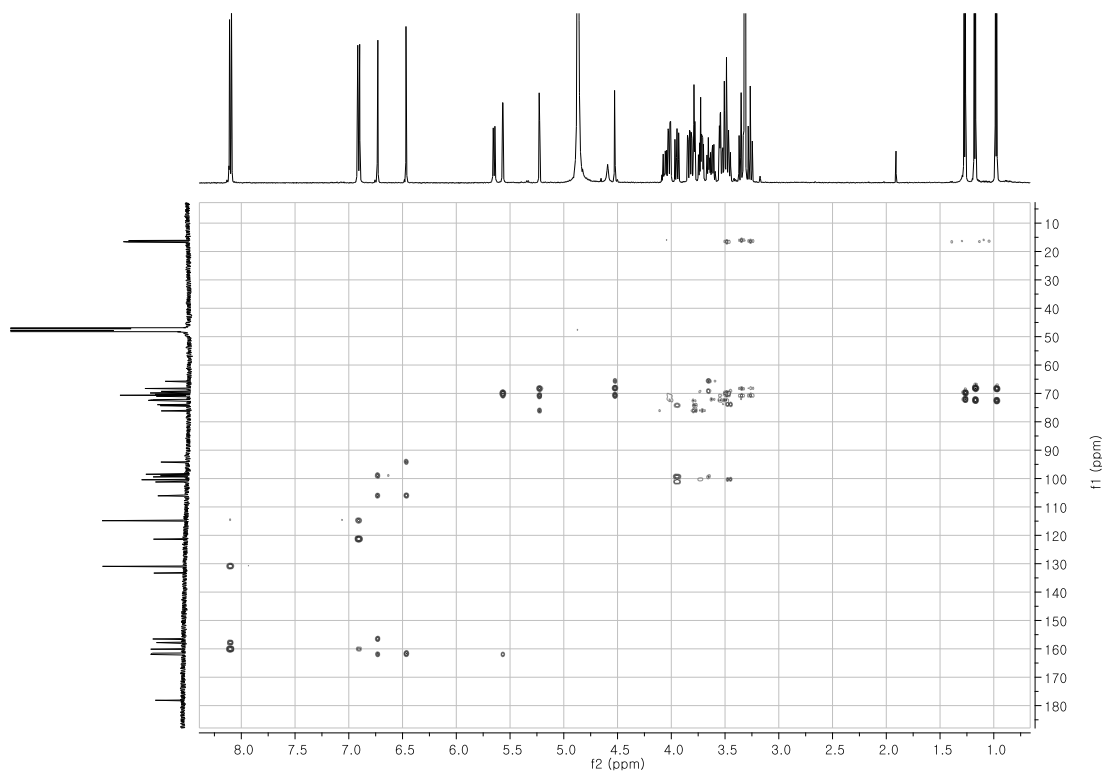

Figure S19. HMBC spectrum of compound **9**.

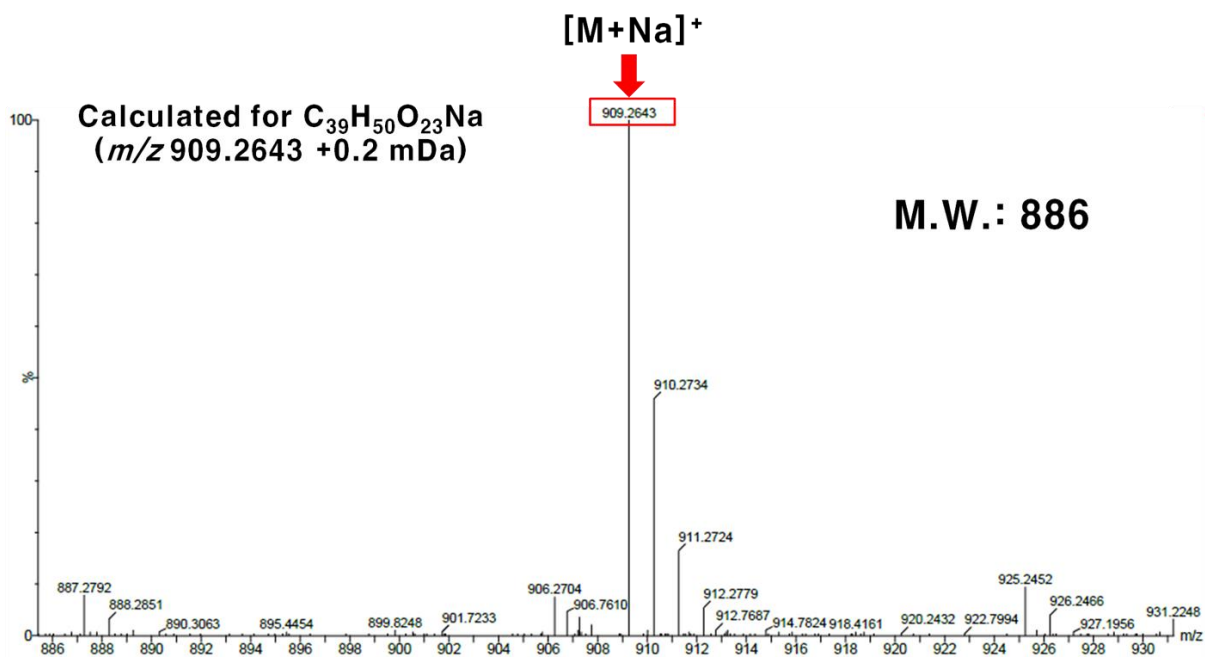

Figure S19. ESI-MS spectrum of compound **9**.

### Elemental Composition Report

Single Mass Analysis

Tolerance = 10.0 PPM / DBE: min = -1.5, max = 50.0

Element prediction: Off

Number of isotope peaks used for i-FIT = 3

Monoisotopic Mass, Even Electron Ions

100 formula(e) evaluated with 3 results within limits (all results (up to 1000) for each mass)

Elements Used:

C: 1-50 H: 1-50 O: 1-30

Minimum: -1.5

Maximum: 500.0 10.0 50.0

| Mass     | Calc. Mass | mDa | PPM | DBE  | i-FIT | Norm  | Conf(%) | Formula      |
|----------|------------|-----|-----|------|-------|-------|---------|--------------|
| 909.2643 | 909.2641   | 0.2 | 0.6 | 14.5 | 308.2 | 0.009 | 99.11   | C39 H50O23Na |

Figure S20. HRESI-MS data of compound **9**.
